# Supplementary material for: Origin of Giant Rashba Effect in Graphene on Pt/SiC
Source: MDPI journal article supplement (doi:10.3390/sym15112052), 2023-11-12
Supplement: s1 [file s1]

Archive with 1 entries (1 files):
- symmetry-2684223-supplementary.pdf
